# Supplementary material for: Spartina alterniflora Invasion Enhances Dissimilatory Nitrate Reduction to Ammonium (DNRA) Rates in the Yangtze River Estuary, China
Source: MDPI journal article supplement (doi:10.3390/jmse10050655), 2022-05-12
Supplement: s1 [file s1]

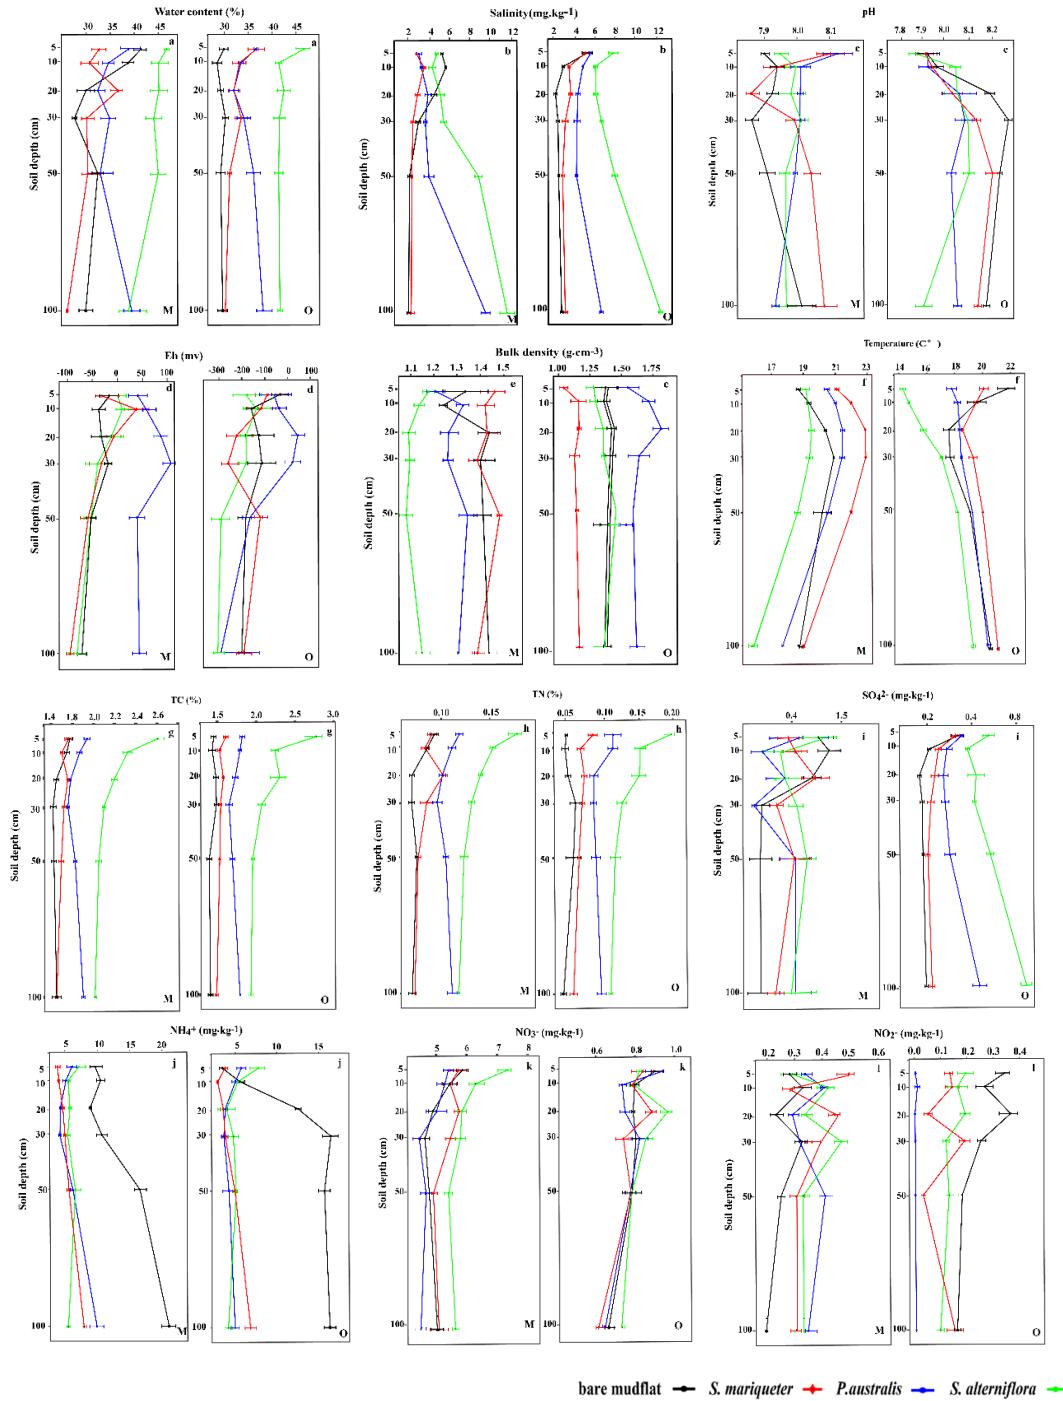

**Figure S1.** Influence of habitat type, soil depth and month on soil properties (mean  $\pm$  SE) (a: Water; b: Salinity; c: pH; d: Eh; e: Bulk density; f: Temperature; g: TC; h: TN; i:  $\text{SO}_4^{2-}$ ; j:  $\text{NH}_4^+$ ; k:  $\text{NO}_3^-$ ; l:  $\text{NO}_2^-$ ). M = May, O = October. BF bare mudflat; SM *S. mariqueter*; SA *S. alterniflora*; PA *P. australis*.
