# Supplementary material for: Spartina alterniflora Invasion Enhances Dissimilatory Nitrate Reduction to Ammonium (DNRA) Rates in the Yangtze River Estuary, China
Source: MDPI journal article supplement (doi:10.3390/jmse10050655), 2022-05-12
Supplement: s1 [file s1]

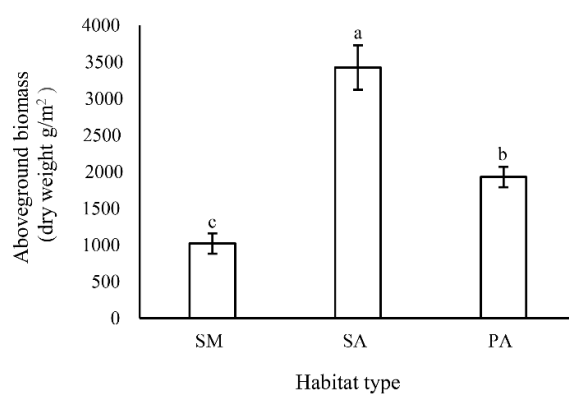

**Figure S2.** Aboveground biomass among different habitat types. Different letters indicate significant differences ( $P < 0.05$ ) among different habitat types. SM, *S. mariqueter*; SA, *S. alterniflora*; PA, *P. australis*.
