# Supplementary material for: Spartina alterniflora Invasion Enhances Dissimilatory Nitrate Reduction to Ammonium (DNRA) Rates in the Yangtze River Estuary, China
Source: MDPI journal article supplement (doi:10.3390/jmse10050655), 2022-05-12
Supplement: s1 [file s1]

**Table S1.** The interpretation rate for each environmental variable obtained from the results of redundancy analysis (RDA) at 0–50 and 50–100 cm soil depths in the two months

| Month   | Soil depth | Variables                     | Explains (%) | P-value |
|---------|------------|-------------------------------|--------------|---------|
| May     | 0-50 cm    | SO <sub>4</sub> <sup>2-</sup> | 37.8         | <0.001  |
|         |            | NO <sub>2</sub> <sup>-</sup>  | 32.65        | 0.063   |
|         |            | Temperature                   | 26.53        | <0.001  |
|         |            | Fe <sup>3+</sup>              | 3.06         | <0.001  |
|         | 0-100 cm   | pH                            | 47.24        | 0.180   |
|         |            | Bulk density                  | 27.72        | 0.101   |
|         |            | NO <sub>2</sub> <sup>-</sup>  | 23.55        | 0.130   |
|         |            | NH <sub>4</sub> <sup>+</sup>  | 0.15         | 0.003   |
| October | 0-50 cm    | pH                            | 84.50        | <0.001  |
|         |            | Salinity                      | 7.75         | <0.001  |
|         |            | NO <sub>3</sub> <sup>-</sup>  | 5.10         | 0.120   |
|         |            | NH <sub>4</sub> <sup>+</sup>  | 1.32         | 0.026   |
|         |            | Eh                            | 0.19         | 0.003   |
|         | 0-100 cm   | pH                            | 65.92        | 0.001   |
|         |            | Bulk density                  | 21.46        | 0.003   |
|         |            | NO <sub>3</sub> <sup>-</sup>  | 6.57         | 0.174   |
|         |            | Temperature                   | 5.96         | 0.001   |
|         |            | Eh                            | 0.07         | 0.111   |
